1 **Do persistent rare species experience stronger negative frequency dependence than**  
2 **common species?**

3 Glenda Yenni<sup>1, \*</sup>, Peter B. Adler<sup>2</sup>, S. K. Morgan Ernest<sup>1</sup>

4 <sup>1</sup> Department of Wildlife Ecology and Conservation, University of Florida, Gainesville, FL  
5 32611

6 <sup>2</sup>Department of Wildland Resources, Utah State University, Logan, UT, 84322

7 \*Corresponding Author: Glenda M. Yenni, Department of Wildlife Ecology and Conservation,  
8 University of Florida, 110 Newins-Ziegler Hall, PO Box 110430, Gainesville, FL 32611  
9 435 213 6860, [glenda@weecology.org](mailto:glenda@weecology.org)

10 Keywords: rare species, coexistence, frequency dependence

11 Running Title: Asymmetric NFD and persistent rare species

12 Abstract: 216 words

13 Body: 4012 words

14 References: 27

15

## 16 **Abstract**

17           Understanding why so many species are rare yet persistent remains a significant  
18 challenge for both theoretical and empirical ecologists. Yenni, Adler, and Ernest (2012) proposed  
19 that strong negative frequency dependence causes species to be rare while simultaneously  
20 buffering them against extinction. This hypothesis predicts that, on average, rare species should  
21 experience stronger negative frequency dependence than common species. However, it is  
22 unknown if ecological communities generally show this theoretical pattern, or if rarity is  
23 primarily determined by other processes that overwhelm the effects of strong negative frequency  
24 dependence. We discuss the implications of this mechanism for natural communities, and  
25 develop a method to test for a non-random relationship between negative frequency dependence  
26 and relative abundance, using species abundance data from 90 communities across a broad range  
27 of environments and taxonomic groups. To account for biases introduced by measurement error,  
28 we compared the observed correlation between species relative abundance and the strength of  
29 frequency dependence against expectations from a randomization procedure. In approximately  
30 half of the analyzed communities, rare species showed disproportionately strong negative  
31 frequency dependence compared to common species. Specifically, we found a pattern of  
32 increasingly strong negative frequency dependence with decreasing relative abundance. Our  
33 results suggest that strong negative frequency dependence is a signature of both rarity and  
34 persistence for many species in many communities.

## 35 **Introduction**

36           Rare species are ubiquitous in nature, but understanding the factors limiting their  
37 abundance and the mechanisms allowing them to persist has proven challenging. Reproducing

38 realistic local-scale community structures with numerous rare species remains difficult using  
39 simple theoretical or statistical models of species interactions (Tilman, 2004; Angert *et al.*, 2009;  
40 Clark *et al.*, 2010). One reason these models fail to predict realistic numbers of rare species is  
41 that many rare species are simply ephemeral, and their occasional presence is likely explained by  
42 metapopulation dynamics. Thus the number of these species in a local community can only be  
43 explained when regional-scale processes are considered along with local-scale processes.  
44 However, not all rare species are ephemeral. Some species manage to persist at low abundance  
45 within a community for long periods of time without succumbing to stochastic extinction events.  
46 Since stochasticity is pervasive in ecological systems, species with low population sizes need  
47 mechanisms that buffer their population dynamics from extinction in order to persist (Tilman,  
48 2004; Kobe & Vriesendorp, 2011). It is this subset of rare species, the persistent rare species,  
49 which remain a paradox for coexistence. Despite the importance of understanding how these rare  
50 species are able to persist, how to determine a rare species' role in a community as persistent or  
51 ephemeral, how prevalent persistent rare species are, and what allows their persistence all remain  
52 controversial (Preston, 1948; Main, 1982; Kunin & Gaston, 1997; Magurran & Henderson, 2003;  
53 Comita *et al.*, 2010). Here we provide empirical evidence for a recently proposed mechanism  
54 that, in theory, can buffer small populations against extinction: asymmetric negative frequency  
55 dependence (Yenni *et al.*, 2012).

## 56 **The role of Negative Frequency Dependence in rarity and persistence**

57 Like density dependence, frequency dependence is a relationship between the population  
58 growth rate and the frequency of a species in a community. However, because it is based on  
59 relative frequency (i.e. abundance relative to other community members) rather than absolute  
60 abundance, frequency dependence arises through both intra and inter-specific interactions (Adler

61 *et al.*, 2007). Negative frequency dependence occurs when a species' population growth rate is  
62 more strongly limited by the density of conspecifics than by the density of heterospecifics (Fig  
63 1A). When negative frequency dependence is strong, relatively small increases in a species'  
64 density, and in turn its frequency in the community, will result in large declines in population  
65 growth rate (Fig 1B). Holding the maximum population growth rate constant, species with  
66 stronger negative frequency dependence must have lower relative abundance than species with  
67 weak negative frequency dependence. In other words, for species experiencing strong negative  
68 frequency dependence, intraspecific competition is the primary cause of rarity (Appendix S2 in  
69 Supporting Information).

70         In contrast, studies of competition often assume that rare species are primarily suppressed  
71 by interspecific competition (Chesson, 2000; Tilman, 2004). But if interspecific competition is  
72 the cause of rarity, how can we explain the long-term persistence of many rare species? Why  
73 don't the superior competitors exclude rare species altogether? Our alternative explanation, that  
74 rare species are strongly frequency-dependent, also explains persistence, because strong  
75 population regulation buffers species against extinction. It is initially counter-intuitive that a  
76 process causing rarity could also promote persistence. However, when a species with strong  
77 negative frequency dependence drops below its equilibrium frequency, it will experience a large  
78 increase in population growth rate (Fig. 1). Because species with strong negative frequency  
79 dependence are more sensitive to increases in their own population numbers, they experience  
80 relatively weak suppression by dominant community members; they are effectively released  
81 from competitive effects as their densities approach zero. Thus, strong negative frequency  
82 dependence can simultaneously limit species' average abundances while buffering them against  
83 extinction if they fall to low density (Yenni *et al.*, 2012).

84 Strong negative frequency dependence should benefit rare species more than common  
85 species (Yenni *et al.*, 2012). Common species are less vulnerable to stochastic extinction due to  
86 their higher abundances. While common species might experience strong or weak negative  
87 frequency dependence, rare species lacking strong negative frequency dependence would be  
88 quickly lost from a local community due to stochastic extinction. In addition, if a rare and  
89 common species experience the same degree of negative frequency dependence (equivalent  
90 slopes in Fig 1), then the rare species must have a lower maximal growth rate. Holding the  
91 equilibrium abundances constant, for the rare species to experience the same buffering against  
92 stochastic extinction (i.e. similar maximal growth rates), it must have stronger negative  
93 frequency dependence. Therefore, we expect a relationship between relative abundance  
94 (frequency) and the strength of negative frequency dependence: species with lower relative  
95 abundances should experience stronger negative frequency dependence.

## 96 **The Asymmetric Negative Frequency Dependence Pattern**

97 While simulations suggest that strong negative frequency dependence should be a common  
98 feature of persistent rare species (Yenni *et al.*, 2012), few empirical studies have assessed this  
99 mechanism. Strong negative density or frequency dependence in some rare species has been  
100 documented (Harpole & Suding, 2007; Adler *et al.*, 2010; Comita *et al.*, 2010; Mangan *et al.*,  
101 2010; Johnson *et al.*, 2012; Xu *et al.*, 2015) but these few studies exclusively focused on select  
102 plant communities. If this is a general pattern across taxa and ecosystems, then this mechanism  
103 could be of general importance to the coexistence and persistence of rare species. However, this  
104 limited number of studies does not tell us how general this pattern is across a variety of natural  
105 communities. Testing the asymmetric negative frequency dependence hypothesis is challenging  
106 because there is no a priori cut-off value for what constitutes strong enough negative frequency

107 dependence to buffer species against stochastic extinction. However, we can examine whether  
108 rarer species have stronger negative frequency dependence than more common species, which is  
109 equivalent to testing whether rare species are more sensitive to intra- than interspecific  
110 competition when compared to common species. If strong negative frequency dependence is  
111 more common among rare species, it would suggest 1) that rare species are not rare because they  
112 are suppressed by superior competitors, but rather because they are more strongly self-limiting,  
113 and 2) that rare species that do not experience a large release from competition at low density, as  
114 implied by strong negative frequency dependence, often do not persist.

### 115 **Testing for Asymmetric Negative Frequency Dependence**

116 To explore the relationship between rarity and negative frequency dependence in  
117 ecological communities, we decided to assess whether there is a general relationship between the  
118 rarity of a species and the strength of negative frequency dependence by examining a large  
119 compilation of publicly available time-series on the abundance of all species within one trophic  
120 guild. Using this approach to evaluate the relationship between abundance and rarity requires 1)  
121 identification of appropriate data, 2) estimating equilibrium frequency and negative frequency  
122 dependence for each species in each community, 3) identifying the persistent community, 4)  
123 estimating a community-level pattern of negative frequency dependence, and 5) accounting for  
124 known and unknown biases in the pattern of interest before making a final conclusion about the  
125 negative frequency dependence-rarity relationship in each community. The methods we  
126 developed to deal with these issues have allowed us to use commonly available data to begin to  
127 explore the relationship between negative frequency dependence and rarity. We hope our results  
128 will spur future research and collection of even more useful data.

## 129 **Identifying Suitable Data for Community Negative Frequency Dependence Patterns**

130 Many of the coexistence mechanisms that generate negative frequency dependence can  
131 operate at very small spatial scales (Chesson, 2000). This is also true in the framework defined in  
132 Yenni et al. (2012). Therefore, to assess whether persistent rare species have stronger negative  
133 frequency dependence than common species, we required communities where the data was  
134 collected in a manner consistent with this local-scale concept. We restricted communities to all  
135 species within a study belonging to the same trophic level and occurring within a single habitat  
136 type as defined by the data collector. If the data collector indicated that the study included  
137 multiple sites of different habitat types or multiple trophic levels these data were treated as  
138 different communities and analyzed separately. If a study collected data from multiple locations  
139 of the same habitat type, we examined those separately. However, to keep a single study area  
140 from dominating the results because it had multiple sites, we treated multiple sites in a single  
141 study area as habitat replicates and only one covariance was estimated from the entire resulting  
142 site data. Finally, to calculate frequency dependence, we used time series data because studies  
143 measuring frequency dependence for all species in a community in an experimental manner are  
144 rare. All of these data decisions were made to ensure we were only analyzing populations that  
145 were likely to be directly interacting and to provide data for a large number and diversity of taxa  
146 and ecosystems. Using these criteria, we found suitable data for 90 different communities  
147 containing collectively 703 species (Appendix S1 in Supplementary Information). These  
148 communities represent six major taxonomic groups (birds, fish, herpetofauna, invertebrates,  
149 mammals, and plants), 5 continents, and 3 trophic levels, thus providing a general exploration of  
150 whether persistent rare species commonly exhibit stronger negative frequency dependence, and  
151 thus, stronger population buffering, than common species.

## 152 **Calculating Negative Frequency Dependence and Equilibrium Frequency**

153 Community time series can be used to estimate equilibrium frequency – the relative  
154 abundance when a species' population is in steady state – and the strength of negative frequency  
155 dependence for all species that met our criteria for persistence within each community (Fig 1A).  
156 We estimated a species' negative frequency dependence as the linear relationship between its  
157 relative abundance (frequency) in a community and its annual per capita population growth rate.  
158 For each community, relative abundance in each year  $t$  for each species  $s$  was calculated as  $x_{t,s} =$   
159  $N_{t,s} / \sum_{s=1:S} N_{t,s}$  (where  $N$  is a species' absolute abundance). Log per capita population growth  
160 rates in each year  $t$  for each species  $s$  were calculated as  $y_{t,s} = \log(N_{t+1,s}/N_{t,s})$ . The relationship  
161 between these population parameters was described as  $\mathbf{Y}_s = \beta_{0,s} + \beta_{1,s} \mathbf{X}_s + \boldsymbol{\varepsilon}_s$  for each species  $s$ .  
162 Equilibrium frequency ( $f$ ), a species' expected relative abundance in the community, is estimated  
163 as the x-intercept of this linear relationship,  $f = -\beta_{0,s}/\beta_{1,s}$ . Frequency dependence ( $FD$ ) is  
164 estimated as the slope of the linear relationship,  $FD = \beta_{1,s}$ .

## 165 **Ephemeral vs. Persistent Species**

166 As discussed in the introduction, asymmetric negative frequency dependence is a  
167 mechanism for maintaining small populations near their steady state despite stochasticity, and  
168 thus only applies to stably coexisting common and rare species. Because other mechanisms are  
169 expected to dominate the population dynamics of invading, declining, or transient species, we  
170 used three criteria to identify and exclude species with population characteristics that would  
171 make them likely to be ephemeral and not stably coexisting (Supplementary Figure S15): 1) too  
172 few occurrences to estimate parameters (i.e. few or no adjacent non-zero abundances, the  
173 inclusion of this type of species in a dataset is typically an arbitrary decision by the data



174 collectors, and was highly variable between datasets), which indicates a species is likely  
175 transient, 2) negative equilibrium frequency (Fig 1B), which indicates the species cannot persist  
176 in the community (7.7% of species, (Chesson, 2000; Adler *et al.*, 2007)), and 3) positive  
177 frequency dependence (Fig 1B), which is related to a negative invasion growth rate and likely  
178 results in either the extinction of that species or an ever increasing invader (11% of species,  
179 (Chesson, 2000; Adler *et al.*, 2007)). Because equilibrium frequency is estimated as the x-  
180 intercept of the fitted relationship between log per capita growth rate and relative abundance, it is  
181 possible for this value to be  $< 0$  or  $> 1$  (Fig 1B). Besides the fact that these species are obviously  
182 ephemeral and thus irrelevant to our analysis, it would make the relationship between  
183 equilibrium frequency and frequency dependence nonsensical to include negative equilibrium  
184 frequencies or positive frequency dependences.

185 All other species are retained as persistent community members. Our criteria are only a  
186 weak filter for removing ephemeral species. Some of the species retained in the analysis are  
187 likely also ephemeral, but we abstained from further filtering to avoid possibly biasing the  
188 results. We examined how this method of identifying persistent species relates to actual  
189 persistence at a site by calculating the percent of years in which a species has non-zero  
190 abundance and comparing these values between ephemeral and persistent species. Our approach  
191 identified a group of more persistent species that were on average present over a higher fraction  
192 of the time series (Supplementary Information Figure S14).

### 193 **Quantifying Asymmetric Negative Frequency Dependence at the Community Level**

194 We currently have no way to objectively characterize a species as experiencing weak or  
195 strong negative frequency dependence. We can, however, estimate the relationship between  
196 relative abundance and negative frequency dependence across all persistent species in the

197 community. To quantify the relationship between rarity and negative frequency dependence  
198 within a community, we calculated the covariance between equilibrium frequency and strength  
199 of negative frequency dependence (Fig 2B). The covariance calculation uses every species in a  
200 community as a single data point in the calculation (Fig 2B):  $cov(\log(f), \log(-FD))$ . Negative  
201 covariances indicate communities in which rare species are experiencing stronger negative  
202 frequency dependence than their dominant counterparts (note that the expectation for  $cov(\log(f),$   
203  $\log(-FD))$  is already negative, we discuss how we addressed this in the following section). Log-  
204 log relationships were most appropriate for calculating these covariances because most  
205 communities contain many species with very low equilibrium frequencies and only a few  
206 dominants, and because the observed negative frequency dependence of the few dominants was  
207 typically at least an order of magnitude lower than the remainder of the community.

### 208 **Dealing with Uncertainty in Abundance Estimates**

209 Time series data with significant observation uncertainty can show the signature of  
210 negative density or frequency dependence even when none exists (Freckleton *et al.*, 2006; Knappe  
211 & de Valpine, 2012) because the calculation can create a negative bias in the resulting population  
212 growth estimates. We designed a randomization procedure to determine which communities  
213 showed a significant negative covariance between equilibrium frequency and the strength of  
214 negative frequency dependence. We reshuffled abundances from the original community time  
215 series 5000 times for each species independently, and then repeated all estimation methods with  
216 the time-randomized data. This procedure maintains relative abundances and observed  
217 variability, but the frequency dependence detected in the randomized data is due to uncertainty  
218 alone. We compared the covariance estimated from the original data to the distribution of  
219 covariance estimated from the randomized data sets to estimate effect size and p-values. We

220 report the difference in the observed pattern from the mean randomized pattern and calculate the  
221 p-value as the proportion of randomized pattern values that are less than or equal to the observed  
222 pattern. Simulations confirm that this approach accounts for known biases resulting from  
223 uncertainty in the observations, as well as sampling biases for rare species (see Supplementary  
224 Information for details). In addition to removing uncertainty bias, this has the added benefit of  
225 removing any effects of community structure (e.g. richness) that may create a bias in the pattern  
226 of interest, because it creates a randomized expectation for each community. This is a  
227 conservative approach, but it enables us to identify communities in which the observed  
228 relationship between rarity and NDF is extremely unlikely to arise due to chance or statistical  
229 artifacts. The significance of the asymmetric negative frequency dependence pattern was  
230 assessed using Strimmer's approach (Strimmer, 2008) to estimate the number of true null  
231 hypotheses, controlling the false discovery rate at 0.1 (Benjamini & Hochberg, 1995, 2000;  
232 Verhoeven *et al.*, 2005). All analyses were performed in the R platform ((R Development Core  
233 Team, 2012) see Supplementary Information).

### 234 **Immigration or Competition?**

235 While Yenni et al (2012) predicted asymmetric frequency dependence emerging from  
236 competition, it is possible that other mechanisms could generate the same pattern. While, only  
237 competition has been explored theoretically, it is possible to imagine scenarios where other  
238 processes could generate or modify negative frequency dependence patterns. We explored one of  
239 the more likely processes to generate asymmetric frequency dependence: immigration.  
240 Immigration is an important process influencing the persistence of species (Brown & Kodric-  
241 Brown, 1977) and is expected to have particular influence on populations of rare species, thus  
242 creating the potential for immigration to influence or even create patterns of asymmetric

243 frequency dependence. We used both our NFD simulation and a more traditional Lotka-Volterra  
244 based model (Chesson, 2000) to explore how immigration influenced negative frequency  
245 dependence in common and rare species (Appendix S4). Results from both models were similar:  
246 immigration did not create patterns of asymmetric frequency dependence and, if anything,  
247 significant amounts of immigration decreases the ability of our method to detect true *in situ*  
248 asymmetric negative frequency dependence (models and results in Appendix S4).

### 249 **Asymmetric Patterns of Negative Frequency Dependence Appear to be Common**

250         When compared to the randomized time series, 46% (41 of 90) of communities  
251 demonstrated a significant relationship between relative abundance and negative frequency  
252 dependence, indicating that rare species experience stronger negative frequency dependence than  
253 common species (Fig 3A, Table 1). While negative relationships between rarity and the strength  
254 of negative frequency dependence often arose in randomized data as well (Fig 2B, 2C), in the  
255 communities where the observed pattern was statistically significant, the stronger negative  
256 frequency dependence of rare species could not be explained solely as a result of bias related to  
257 uncertainty in the abundance estimates. These results indicate real differences between rare and  
258 common species in the sensitivity of population growth rates to the abundance of heterospecifics  
259 and conspecifics.

260         The prevalence of asymmetric negative frequency dependence within communities varied  
261 by taxonomic group (Fig 3B-G). In approximately half of bird, fish, invertebrate, mammal and  
262 plant communities (50%, 50%, 48%, 53% and 53%, respectively) rare species experienced  
263 stronger negative frequency dependence than their dominant counterparts (Table 1, Fig 3).  
264 However, only 9% of herpetofauna communities had a significant asymmetric negative

265 frequency dependence structure. Why asymmetric negative frequency dependence is less  
266 prevalent in herpetofauna communities is unclear, though the documented sensitivity of  
267 herpetofauna to disturbance is one possibility for their differing dynamics (Collins & Storer,  
268 2003). Across all taxa, only a few communities had dominant species with stronger negative  
269 frequency dependence estimates than the rare species, but this pattern was never significant (see  
270 Table S1 in Supplementary Information). Thus, while rare species often, but not always, showed  
271 significantly stronger negative frequency dependence than common species, common species  
272 never showed stronger negative frequency dependence than rare species. Despite differences in  
273 diversity, complexity of species interactions and how species may achieve the necessary  
274 population dynamics, the phenomenon of rare species exhibiting stronger negative frequency  
275 dependence than more common species appears to be widespread across community types.

276 Simulations testing our randomization procedure for addressing bias caused by measurement  
277 error (Supplementary Information) demonstrated that our method consistently assigns  
278 significance when the relationship between equilibrium frequency and negative frequency  
279 dependence is strong, but it typically fails to detect weak relationships. Therefore, our non-  
280 significant results likely include some communities where a relationship between relative  
281 abundance and negative frequency dependence exists, but is too weak for our method to detect.  
282 If so, then the prevalence of strong negative frequency dependence in rare species is likely more  
283 common than our results indicate. Overall, our results suggest that in many communities,  
284 persistent rare species may commonly exhibit stronger negative frequency dependence than the  
285 more common species in the community.

## 286 **Implications**

287           The theory developed in Yenni et al. (2012) and the results presented here imply that  
288 differences between rare and common species in their sensitivity to intraspecific and interspecific  
289 competition may explain the existence of persistent rare species in many communities. This  
290 finding leads to a variety of interesting research questions. Why are rare species more sensitive  
291 to intraspecific than interspecific competition? One possibility is that both strong sensitivity to  
292 congeners and an ability to increase rapidly when the population falls below its equilibrium  
293 frequency are traits of rare species, e.g. a result of specialization on a rare resource or  
294 susceptibility to virulent species-specific natural enemies. An alternative explanation is that  
295 strong negative frequency dependence is not a fixed trait but is context-dependent. Some species  
296 might show strong negative frequency dependence when conditions cause them to be rare  
297 members of the community but weaker negative frequency dependence in communities when  
298 they are more dominant. The limited availability of community time series data does not allow us  
299 to directly link strong negative frequency dependence to species traits or to test whether some  
300 species may show weak negative frequency dependence when they are dominant but strong  
301 negative frequency dependence when they are rare.

302           Yenni et al (2012) described a theoretical framework in which the stronger negative  
303 frequency dependence of rare species emerges from intraspecific competition. Our empirical  
304 results are consistent with the theory and suggest that asymmetric density dependence may  
305 structure many communities. Our simulations, provided in the Supplementary Information,  
306 further support the idea that the prevalence of asymmetric negative frequency dependence is not  
307 merely an artifact of uncertainty due to sampling biases or immigration. That is not to say that  
308 immigration as an ecological process, along with other processes such as facilitation and  
309 interaction networks, cycles, chaotic dynamics, and nonlinear negative frequency dependences

310 could not also create or modify patterns of negative frequency dependence. For example, while  
311 we explored a particular implementation of immigration, it is still possible that immigration  
312 might be able to generate asymmetric negative frequency dependence under specific  
313 circumstances. Clearly it is important for coexistence theory to assess whether these other  
314 processes can also generate or enhance community-level patterns of asymmetric frequency  
315 dependence, especially as it relates to the concept of persistent rare species.

316         Regardless of the underlying mechanisms, or whether strong negative frequency  
317 dependence is a fixed or plastic trait of rare species, our results suggest that exploring the causes  
318 and consequences of asymmetric negative frequency dependence may be important not only for  
319 coexistence theory, but also for designing management strategies for rare species. If intraspecific  
320 competition is the primary cause of rarity, then indirect effects of environmental change  
321 mediated by competitive interactions (Adler *et al.*, 2012) might be relatively weak for rare  
322 species compared to common species. Similarly, we might expect management actions intended  
323 to increase the abundance of a rare species by reducing the density of interspecific competitors to  
324 be unsuccessful. However, if asymmetric negative frequency dependence is being generated by  
325 other mechanisms such as immigration, then the implications for designing management  
326 strategies will be very different. Investigating the mechanisms that lead to asymmetric negative  
327 frequency dependence is an important step for understanding, and potentially managing, the  
328 many rare species in natural communities.

### 329 **Future Analyses**

330         Our analysis also highlights analytical and theoretical limitations to our understanding of  
331 negative frequency dependence that need to be addressed for research into negative frequency

332 dependence to progress further. Definitive statements about the absolute strength of negative  
333 frequency dependence in common and rare species would require unbiased estimates of  
334 maximum population growth rates and density dependence. In contrast, our randomization test  
335 focuses on the relative strength of negative frequency dependence in common vs. rare species.  
336 Direct, unbiased estimates of negative frequency dependence would remove the need for our  
337 conservative approach, and could reveal the role of asymmetric negative frequency dependence  
338 in additional communities. An additional challenge for future research is disentangling the effects  
339 of intra- and interspecific competition from other potential mechanisms of negative frequency  
340 dependence such as immigration or nonlinear dynamics. Addressing this challenge will also  
341 require more sophisticated methods for correcting negative frequency dependence for bias or,  
342 alternatively, individual-level data on vital rates and dispersal.

### 343 **Summary**

344 Our work suggests that strong negative frequency dependence in persistent rare species  
345 could be a mechanism that helps offset stochastic extinction risk. If true, this concept has wide-  
346 ranging implications for our understanding of coexistence. However, in exploring this idea, we  
347 found severe limitations in the current state of data, statistics, and theory that prevented us from  
348 conducting robust empirical analyses or interpreting rigorously the mechanism behind the  
349 patterns we uncovered. Given the importance, and possible generality, of asymmetric frequency  
350 dependence, we hope that our work here will inspire others to help solve these challenges so we  
351 may all better understand the mechanisms that allow rare species to persist in nature.

352

353



354 Acknowledgements

355           A review by Dr. Robert Holt significantly improved the quality of this manuscript. Much  
356 of the credit for the Supplementary Information on negative frequency dependence goes to Dr.  
357 Holt. We thank all the researchers who have made their data publicly available and have  
358 permitted its use in this manuscript. Further information about these datasets and dataset specific  
359 acknowledgements of personnel and funding sources can be found in Appendix S1. Thank you to  
360 Sarah Supp and the Mammal Community Database, Elita Baldrige, Ryan O'Donnell, and all the  
361 contributors to the Ecological Data Wiki for assistance in identifying available community  
362 datasets. G. Yenni was supported by the Ecology Center at Utah State University and an NSF  
363 grant (DEB-1100664). PBA was supported by NSF DEB-1054040.

364

365 References

- 366 Adler, P.B., Dalgleish, H.J. & Ellner, S.P. (2012) Forecasting plant community impacts of climate  
367 variability and change: when do competitive interactions matter? *Journal of Ecology*,  
368 **100**, 478–487.
- 369 Adler, P.B., Ellner, S.P. & Levine, J.M. (2010) Coexistence of perennial plants: an  
370 embarrassment of niches. *Ecology Letters*, **13**, 1019–1029.
- 371 Adler, P.B., HilleRisLambers, J. & Levine, J.M. (2007) A niche for neutrality. *Ecology Letters*,  
372 **10**, 95–104.
- 373 Angert, A.L., Huxman, T.E., Chesson, P. & Venable, D.L. (2009) Functional tradeoffs determine  
374 species coexistence via the storage effect. *Proceedings of the National Academy of  
375 Sciences of the United States of America*, **106**, 11641–11645.
- 376 Benjamini, Y. & Hochberg, Y. (1995) Controlling the False Discovery Rate: A Practical and  
377 Powerful Approach to Multiple Testing. *Journal of the Royal Statistical Society. Series B  
378 (Methodological)*, **57**, 289–300.
- 379 Benjamini, Y. & Hochberg, Y. (2000) On the Adaptive Control of the False Discovery Rate in  
380 Multiple Testing With Independent Statistics. *Journal of Educational and Behavioral  
381 Statistics*, **25**, 60–83.
- 382 Brown, J.H. & Kodric-Brown, A. (1977) Turnover Rates in Insular Biogeography: Effect of  
383 Immigration on Extinction. *Ecology*, **58**, 445–449.
- 384 Chesson, P. (2000) Mechanisms of maintenance of species diversity. *Annual Review of Ecology  
385 and Systematics*, **31**, 343–366.
- 386 Clark, J.S., Bell, D., Chu, C., Courbaud, B., Dietze, M., Hersh, M., HilleRisLambers, J., Ibáñez,  
387 I., LaDeau, S., McMahon, S., Metcalf, J., Mohan, J., Moran, E., Pangle, L., Pearson, S.,  
388 Salk, C., Shen, Z., Valle, D. & Wyckoff, P. (2010) High-dimensional coexistence based  
389 on individual variation: a synthesis of evidence. *Ecological Monographs*, **80**, 569–608.
- 390 Collins, J.P. & Storfer, A. (2003) Global amphibian declines: sorting the hypotheses. *Diversity  
391 and Distributions*, **9**, 89–98.
- 392 Comita, L.S., Muller-Landau, H.C., Aguilar, S. & Hubbell, S.P. (2010) Asymmetric density  
393 dependence shapes species abundances in a tropical tree community. *Science*, **329**, 330 –  
394 332.
- 395 Freckleton, R.P., Watkinson, A.R., Green, R.E. & Sutherland, W.J. (2006) Census error and the

- 396 detection of density dependence. *Journal of Animal Ecology*, **75**, 837–851.
- 397 Harpole, W.S. & Suding, K.N. (2007) Frequency dependence stabilizes competitive interactions  
398 among four annual plants. *Ecology Letters*, **10**, 1164–1169.
- 399 Johnson, D.J., Beaulieu, W.T., Bever, J.D. & Clay, K. (2012) Conspecific Negative Density  
400 Dependence and Forest Diversity. *Science*, **336**, 904–907.
- 401 Knape, J. & de Valpine, P. (2012) Are patterns of density dependence in the Global Population  
402 Dynamics Database driven by uncertainty about population abundance? *Ecology Letters*,  
403 **15**, 17–23.
- 404 Kobe, R.K. & Vriesendorp, C.F. (2011) Conspecific density dependence in seedlings varies with  
405 species shade tolerance in a wet tropical forest. *Ecology Letters*, **14**, 503–510.
- 406 Kunin, W.E. & Gaston, K.J. (1997) *The Biology of Rarity: Causes and Consequences of Rare-  
407 Common Differences*, Springer.
- 408 Magurran, A.E. & Henderson, P.A. (2003) Explaining the excess of rare species in natural  
409 species abundance distributions. *Nature*, **422**, 714–716.
- 410 Main, A.R. (1982) *Rare species: precious or dross? Species at risk: Research in Australia* (ed. by  
411 R.H. Groves) and W.D.L. Ride), pp. 163–174. Australian Academy of Science, Canberra.
- 412 Mangan, S.A., Schnitzer, S.A., Herre, E.A., Mack, K.M.L., Valencia, M.C., Sanchez, E.I. &  
413 Bever, J.D. (2010) Negative plant-soil feedback predicts tree-species relative abundance  
414 in a tropical forest. *Nature*, **466**, 752–755.
- 415 Preston, F.W. (1948) The commonness and rarity of species. *Ecology*, **29**, 254–283.
- 416 R Development Core Team (2012) *R: A language and environment for statistical computing.*, R  
417 Foundation for Statistical Computing, Vienna, Austria.
- 418 Strimmer, K. (2008) A unified approach to false discovery rate estimation. *BMC Bioinformatics*,  
419 **9**, 303.
- 420 Tilman, D. (2004) Niche tradeoffs, neutrality, and community structure: A stochastic theory of  
421 resource competition, invasion, and community assembly. *Proceedings of the National  
422 Academy of Sciences of the United States of America*, **101**, 10854–10861.
- 423 Verhoeven, K.J.F., Simonsen, K.L. & McIntyre, L.M. (2005) Implementing false discovery rate  
424 control: increasing your power. *Oikos*, **108**, 643–647.
- 425 Xu, M., Wang, Y. & Yu, S. (2015) Conspecific negative density dependence decreases with  
426 increasing species abundance. *Ecosphere*, **6**, 1–11.

427 Yenni, G., Adler, P.B. & Ernest, S.K.M. (2012) Strong self-limitation promotes the persistence of  
428 rare species. *Ecology*, **93**, 456–461.  
429

430 Biosketches

431        Glenda Yenni is a multidisciplinary ecologist interested in drawing connections between  
432 theory and observation in community ecology. Peter Adler is a plant ecologist interested in  
433 explaining population and community dynamics in space and time. S.K. Morgan Ernest is a  
434 macroecologist and community ecologist studying the temporal dynamics of community  
435 assembly.  
436

437 Table 1: Summary results of community-level analyses by taxonomic group.

| Taxonomic Group | Num. communities | <u>Mean Values Across Communities</u> |                          |                                |                                    |                                       | Num. significant communities | Proportion significant. |
|-----------------|------------------|---------------------------------------|--------------------------|--------------------------------|------------------------------------|---------------------------------------|------------------------------|-------------------------|
|                 |                  | Spp/community                         | Persistent spp/community | Observed covariance ( $\rho$ ) | Randomized covariance ( $\rho_0$ ) | Covariance strength ( $\rho/\rho_0$ ) |                              |                         |
| Birds           | 14               | 25.9                                  | 21.1                     | -1.68                          | -1.29                              | 1.38                                  | 7                            | 0.50                    |
| Fish            | 6                | 8.8                                   | 7.0                      | -9.02                          | -7.41                              | 1.40                                  | 3                            | 0.50                    |
| Herpetofauna    | 11               | 11.4                                  | 7.0                      | -0.41                          | -0.67                              | 0.27                                  | 1                            | 0.09                    |
| Invertebrates   | 25               | 42.0                                  | 12.2                     | -3.86                          | -2.84                              | 1.69                                  | 12                           | 0.48                    |
| Mammals         | 17               | 7.8                                   | 4.6                      | -1.70                          | -1.08                              | 2.65                                  | 9                            | 0.53                    |
| Plants          | 17               | 82.0                                  | 22.6                     | -3.74                          | -2.61                              | 1.64                                  | 9                            | 0.53                    |
| Total           | <b>90</b>        |                                       |                          |                                |                                    |                                       | <b>41</b>                    | <b>0.46</b>             |

438 Covariances ( $\rho$  and  $\rho_0$ ) were calculated as  $cov(\log(f), \log(-FD))$ . The number of significant  
 439 communities are those in which the covariance was determined significant after false discovery  
 440 rate control ( $\alpha=0.1$ ).  
 441

442 Figure Legends

443 Figure 1: A) Negative frequency dependence and equilibrium frequency can be calculated from  
444 time-series community data. Each data point represents the relative abundance of species  $i$  at  
445 time  $t$  in its community (x-axis) and its log per capita population growth rate from time  $t$  to time  
446  $t+1$  (y-axis). The slope of this line is the species' negative frequency dependence ( $NFD = -\beta_1$  in  
447 the linear model). Equilibrium frequency – the expected relative abundance of species  $i$  in the  
448 community when its population growth is at equilibrium - is the fitted x-intercept of the  
449 relationship. The fitted y-intercept is the species' maximal growth rate. B) The x-intercept and  
450 slope of the relationship indicate important biological information about each species. Steep  
451 slopes indicate stronger negative frequency dependence, and thus higher sensitivity of population  
452 growth to changes in conspecifics than to changes in heterospecifics. In a linear relationship,  
453 high maximal growth rates, which buffer species from extinction, are achieved through high  
454 equilibrium frequencies (common species, solid grey line), or strong negative frequency  
455 dependence (rare species, solid black line). X-intercepts  $< 0$  indicate species that cannot maintain  
456 a stable presence within the community at their population equilibrium. Species exhibiting  
457 positive frequency dependence will often have difficulty invading when rare. These latter two  
458 scenarios indicate species that are likely not stably coexisting within the current community.

459 Figure 2: An example of our analyses using the Portal rodent community. (A) The relationship  
460 between relative abundance and growth rate is fit for each species. The slope of this relationship  
461 is the "Strength of NFD" for each species, and the x-intercept is the "Equilibrium Frequency."  
462 (B) Using each species as a datapoint, the covariance between these two parameters (-1.17 in this  
463 example) is the value of interest, but it contains known biases. Randomizations of the time series  
464 were used to create a baseline expectation for each unique community, and the observed

465 relationship was considered relative to this baseline (the Randomized Covariance, -0.46 in this  
466 example). Thus, we use the proportional difference in the empirical covariance from random  
467 (observed covariance/mean randomized covariance,  $-1.17/-0.46 = 2.54$ ). The empirical pattern in  
468 this community (solid black line, with shaded 95% confidence intervals) compared to one  
469 realization from the randomized results (out of 5000 randomizations), accounts for the bias in the  
470 negative frequency dependence estimates introduced by measurement error and the artificial  
471 relationship this creates (dashed line, with shaded 95% confidence intervals). (C) P-values were  
472 calculated as the proportion of randomized values larger than the observed asymmetry value (-  
473 1.17, p-value = 0.0032 in this example).

474 Figure 3: Results were compared to randomized data to account for bias introduced by  
475 measurement error and determine which relationships were significant (colored bars) or not (grey  
476 bars). P-values were calculated as the proportion of randomized values larger than the observed  
477 asymmetry value. (A) All results for the 90 communities included in the analysis. We detected a  
478 significantly asymmetric negative frequency dependence pattern in 46% of these communities.  
479 (B) Results separated by taxonomic group, showing the relative size of the asymmetry in  
480 negative frequency dependence between species in each community (Observed  
481 Covariance/Randomized Covariance). The proportion value in each panel is the proportion of  
482 communities in that group with a significant asymmetric negative frequency dependence pattern.

483



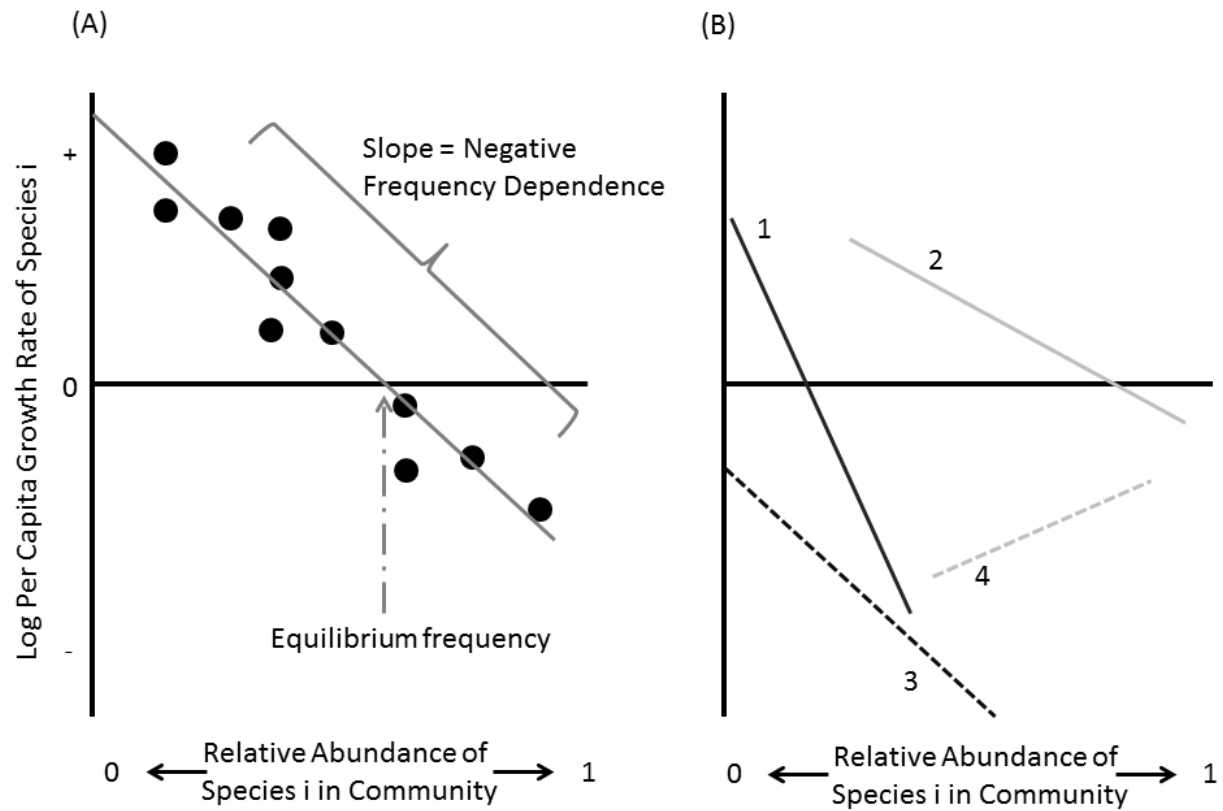

484

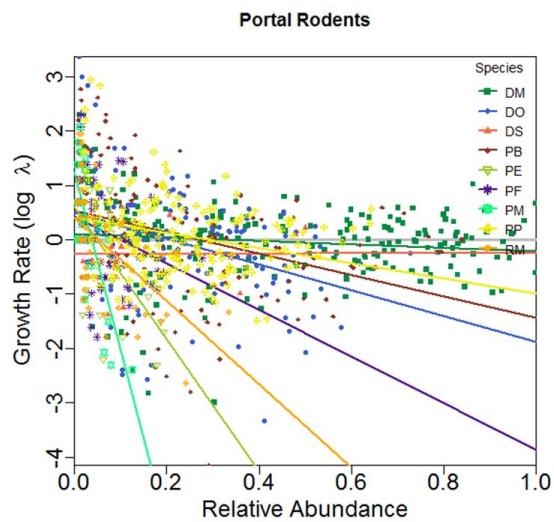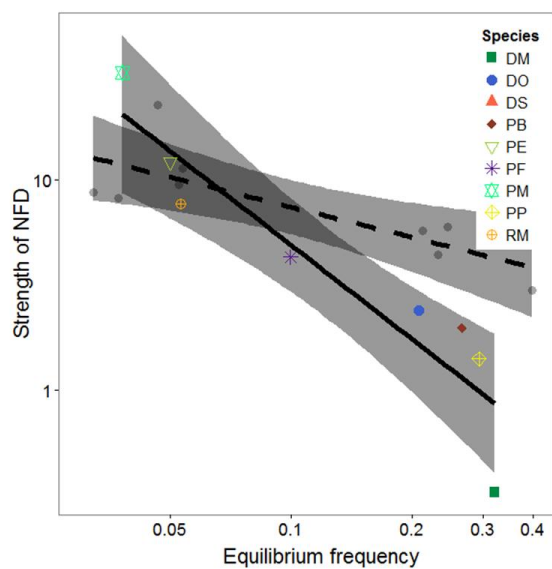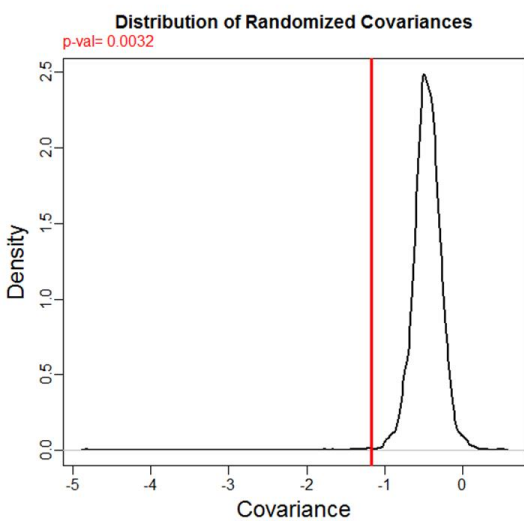

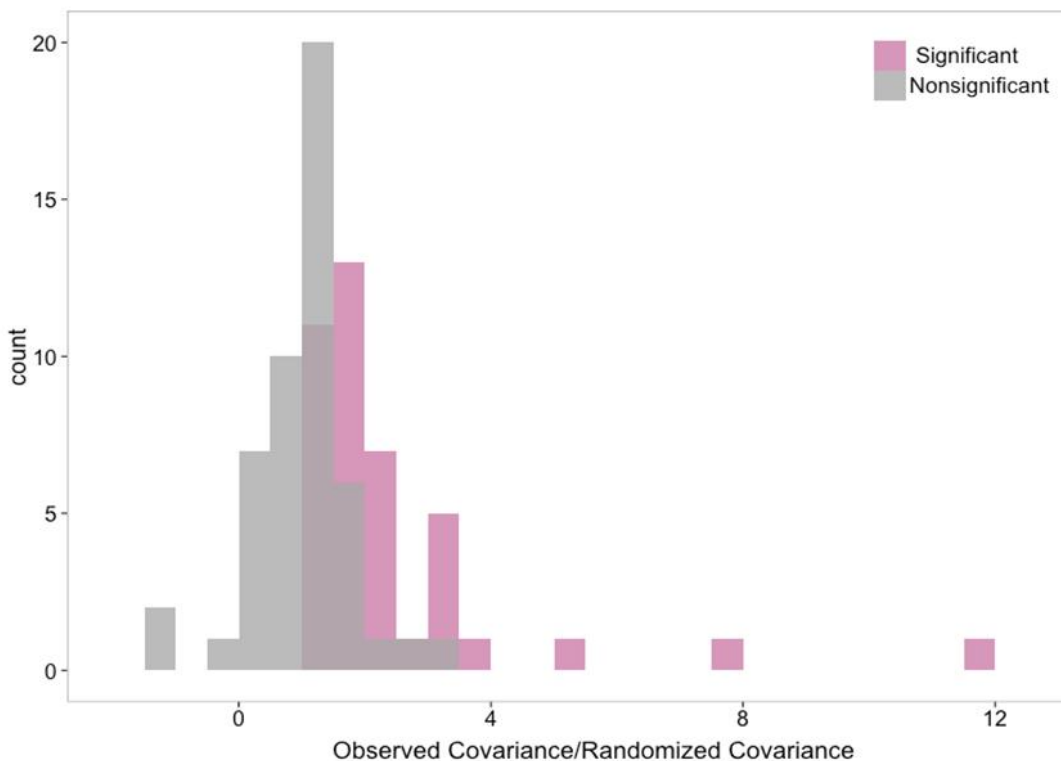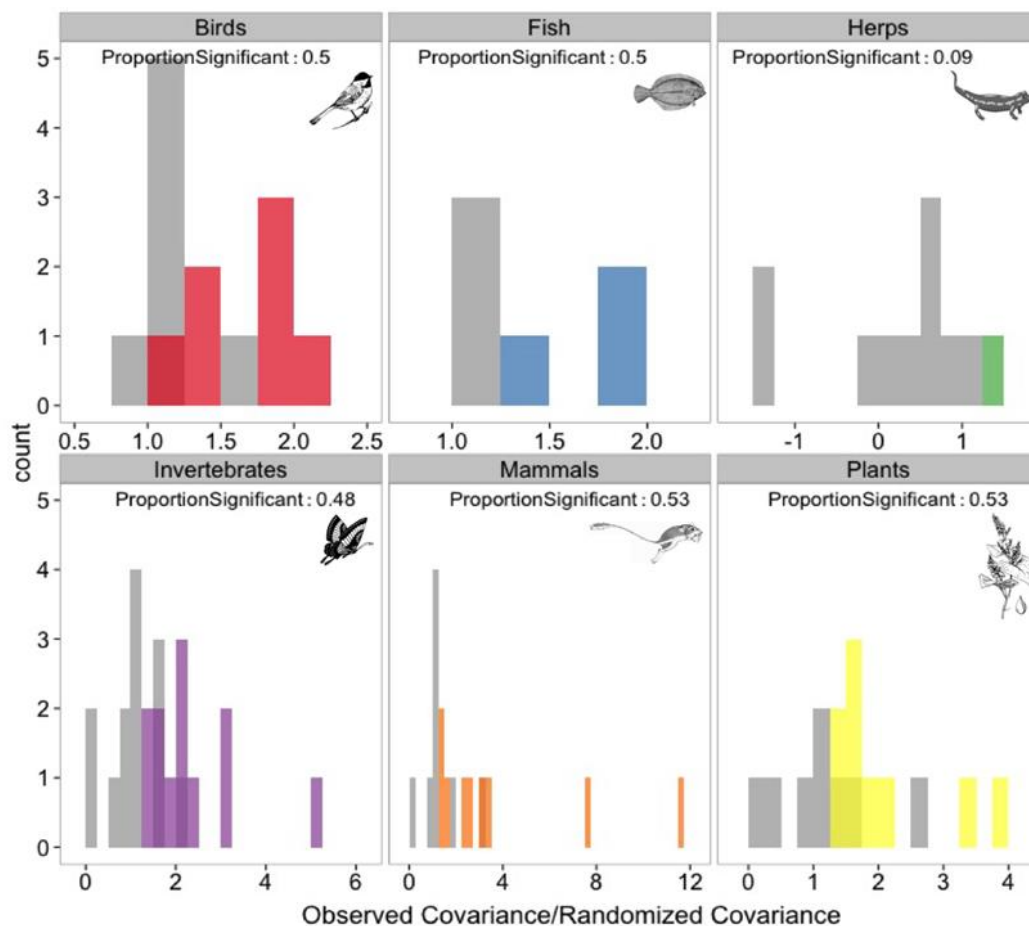

Source: https://www.biorxiv.org/content/10.1101/040360.full.pdf
